# Supplementary material
Source: Frontiers journal article supplement (https://www.frontiersin.org/articles/281654)
Supplement: Presentation_3.PDF [file Presentation_3.PDF]

## *Supplementary Material*

### **Nanowire FET based Neural Element for Robotic Tactile Sensing System**

**William Taube Navaraj<sup>1</sup>, Carlos G. Nunez<sup>1</sup>, Dhayalan Shakthivel<sup>1</sup>, Vincenzo Vinciguerra<sup>2</sup>, Fabrice Labeau<sup>3</sup>, Duncan Gregory<sup>4</sup> and Ravinder Dahiya<sup>1\*</sup>**

<sup>1</sup>Bendable Electronics and Sensing Technologies group, School of Engineering, University of Glasgow, UK.

<sup>2</sup>ST Microelectronics, Italy.

<sup>3</sup>McGill University, Montreal, Canada.

<sup>4</sup>School of Chemistry, University of Glasgow, UK

**\*Correspondence:** [Ravinder.Dahiya@glasgow.ac.uk](mailto:Ravinder.Dahiya@glasgow.ac.uk)

### 3 Output of Sensory Decay Neuron in System Model implemented in SimBrain

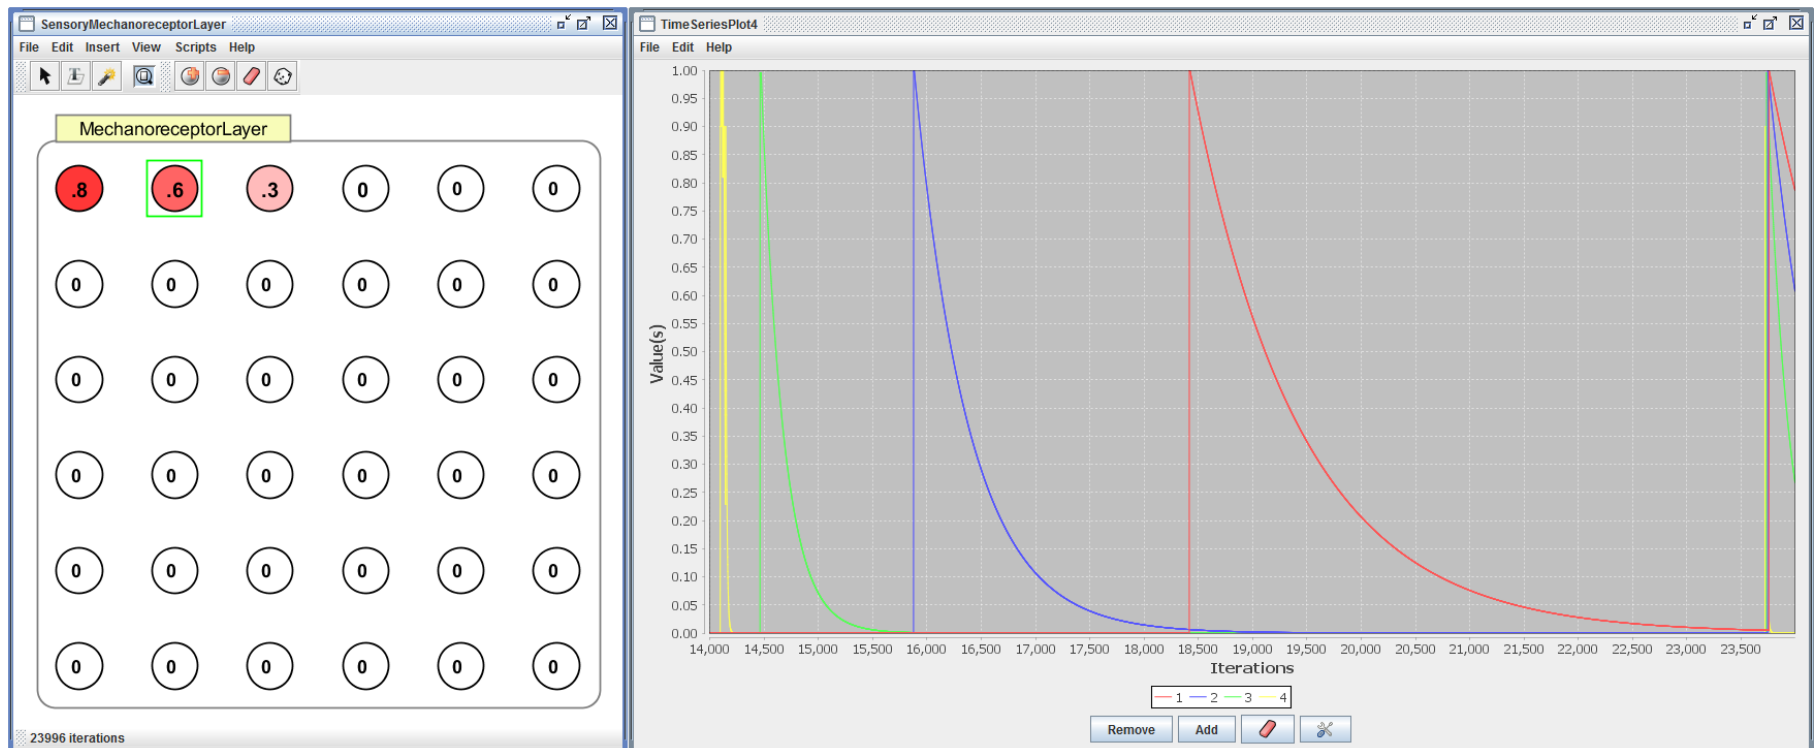

Fig. S3-1: Snapshot of the time series output of Sensory Decay Neuron in System Model implemented in SimBrain corresponding to decay constants Yellow(0.1), Green (0.005), Blue (0.002), Red (0.001),
